# Supplementary material
Source: PubMed Central journal article supplement (PMC7537631)

## Supplemental Data for the Letter to Editor Out-of-hospital cardiac arrest during the COVID-19 era in Bologna: system response to preserve performances by Federico Semeraro et al.

**Figure 1: Total numbers and positive cases SARS-COV-2 swabs performed (1<sup>st</sup> March to 12<sup>nd</sup> July 2020)**

Available data published 13th July 2020 at <https://www.ausl.bologna.it/per-i-cittadini/coronavirus/rcps>

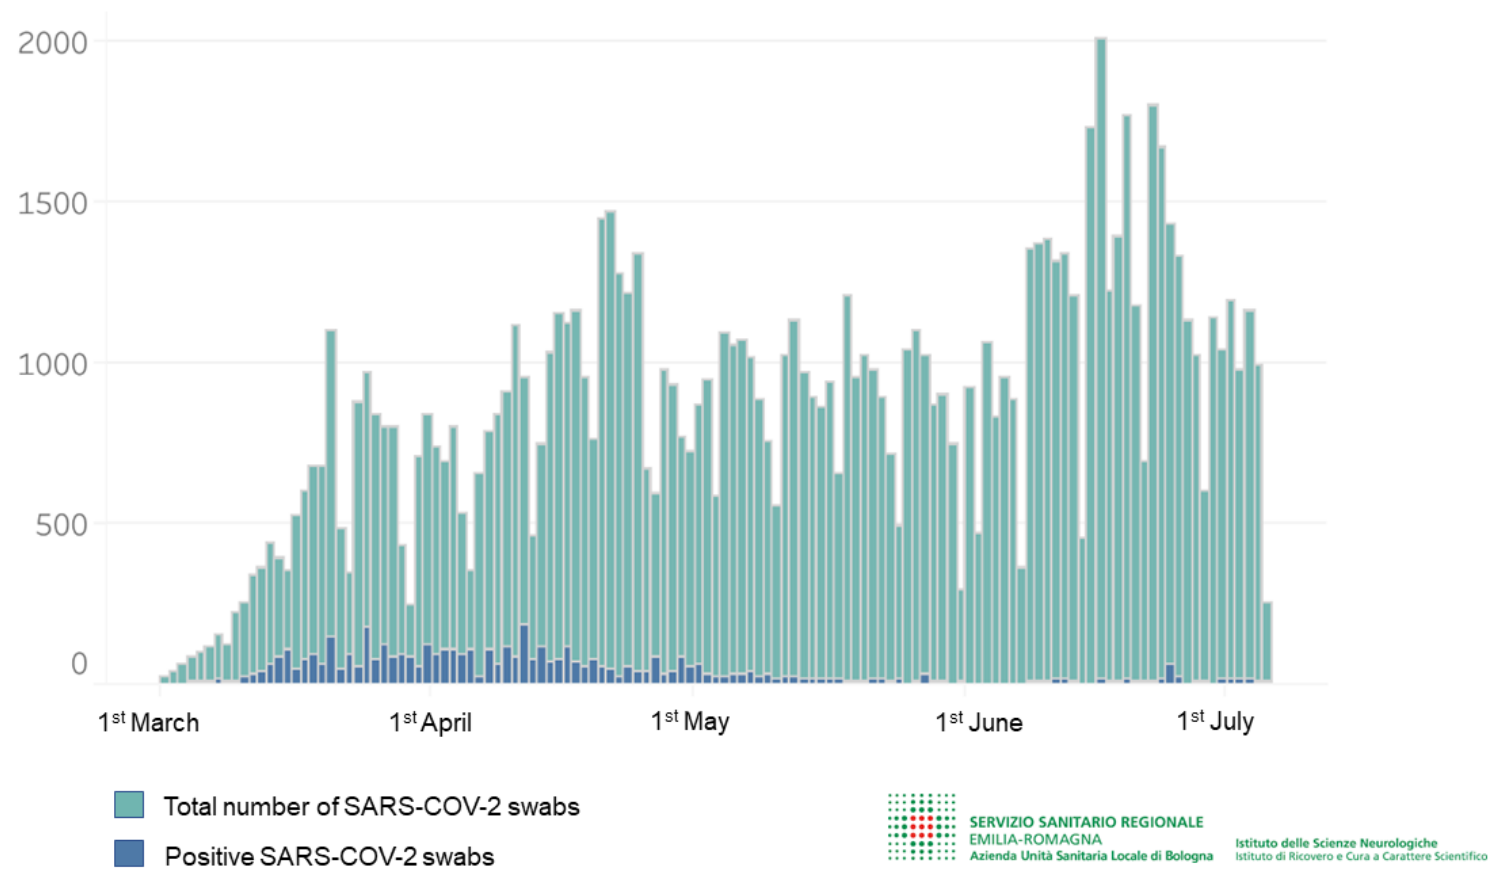

**Table 1: Bologna Area (Bologna, Casalecchio di Reno, San Lazzaro) ISTAT Mortality Data 2020 vs 2015-2019**

Available data published 9th July 2020 at <https://www.istat.it/it/archivio/240401>

| Municipality          | Mortality Increase (%)                     |                                            |                                            |                                            |                                            |
|-----------------------|--------------------------------------------|--------------------------------------------|--------------------------------------------|--------------------------------------------|--------------------------------------------|
|                       | 1 <sup>st</sup> -31 <sup>st</sup> Jan 2020 | 1 <sup>st</sup> -29 <sup>st</sup> Feb 2020 | 1 <sup>st</sup> -31 <sup>st</sup> Mar 2020 | 1 <sup>st</sup> -30 <sup>th</sup> Apr 2020 | 1 <sup>st</sup> -31 <sup>th</sup> May 2020 |
| Bologna               | - 19.7 %                                   | + 1.1 %                                    | + 26.2 %                                   | + 68.3 %                                   | + 0.9 %                                    |
| Casalecchio di Reno   | - 13.0 %                                   | -9.3 %                                     | + 11.4 %                                   | + 41.0 %                                   | + 16.1 %                                   |
| San Lazzaro di Savena | - 26.1 %                                   | + 14.8 %                                   | -3.7 %                                     | + 91.7 %                                   | - 5.7 %                                    |
| Avg value             | - 19.6 %                                   | + 2.2 %                                    | + 11.3 %                                   | <b>+ 67.0 %</b>                            | + 3.8 %                                    |

**Table 2: Etiology and location of cardiac arrest**

|                 | <b>N (%) 2019 (n = 110)</b> | <b>N (%) 2020 (n = 95)</b> |           |
|-----------------|-----------------------------|----------------------------|-----------|
| <b>Etiology</b> |                             |                            | p = 0.680 |
| Medical         | 99 (90%)                    | 89 (94%)                   |           |
| Traumatic       | 6 (5%)                      | 4 (4%)                     |           |
| Drug overdose   | 4 (4%)                      | 2 (2%)                     |           |
| Drowning        | 1 (1%)                      | 0                          |           |
| Electrocution   | 0                           | 0                          |           |
| Asphyxia        | 0                           | 0                          |           |
|                 |                             |                            |           |
| <b>Location</b> |                             |                            | p = 0.476 |
| Home            | 82 (75%)                    | 65 (68%)                   |           |
| Street          | 18 (16%)                    | 13 (14%)                   |           |
| Public building | 2 (2%)                      | 2 (2%)                     |           |
| Work/office     | 1 (1%)                      | 1 (1%)                     |           |
| Sport facility  | 0                           | 0                          |           |
| School          | 1 (1%)                      | 1 (1%)                     |           |
| Other           | 6 (5%)                      | 13 (14%)                   |           |

**Table 3: Presenting rhythm and survival**

|                                     | January - June 2019 (n = 110) | January - June 2020 (n = 95) |                  |
|-------------------------------------|-------------------------------|------------------------------|------------------|
| <b>Presenting rhythm</b>            | <b>N (%)</b>                  | <b>N (%)</b>                 | <b>p = 0.285</b> |
| Ventricular fibrillation (VF)       | 34 (31%)                      | 30 (32%)                     |                  |
| Ventricular tachycardia (VT)        | 0                             | 3 (3%)                       |                  |
| Pulseless electrical activity (PEA) | 47 (43%)                      | 36 (38%)                     |                  |
| Asystole                            | 29 (26%)                      | 26 (27%)                     |                  |
| <b>ROSC</b>                         | <b>N (%)*</b>                 | <b>N (%)*</b>                | <b>p = 0.635</b> |
| Ventricular fibrillation (VF)       | 19 (56%)                      | 17 (57%)                     |                  |
| Ventricular tachycardia (VT)        | 0                             | 1 (33%)                      |                  |
| Pulseless electrical activity (PEA) | 27 (57%)                      | 16 (44%)                     |                  |
| Asystole                            | 8 (28%)                       | 4 (15%)                      |                  |
| Total                               | 54 (49%)                      | 38 (40%)                     |                  |
| <b>Hospital Admission</b>           | <b>N (%)<sup>+</sup></b>      | <b>N (%)<sup>+</sup></b>     | <b>p = 0.773</b> |
| Ventricular fibrillation (VF)       | 17 (50%)                      | 14 (47%)                     |                  |
| Ventricular tachycardia (VT)        | 0                             | 1 (33%)                      |                  |
| Pulseless electrical activity (PEA) | 19 (40%)                      | 13 (36%)                     |                  |
| Asystole                            | 6 (21%)                       | 3 (12%)                      |                  |
| Total                               | 42 (38%)                      | 31 (33%)                     |                  |
| <b>Hospital Discharge</b>           | <b>N (%)<sup>§</sup></b>      | <b>N (%)<sup>§</sup></b>     | <b>p = 0.490</b> |
| Ventricular fibrillation (VF)       | 13 (38%)                      | 10 (33%)                     |                  |
| Ventricular tachycardia (VT)        | 0                             | 1 (33%)                      |                  |
| Pulseless electrical activity (PEA) | 9 (19%)                       | 10 (28%)                     |                  |
| Asystole                            | 0                             | 2 (8%)                       |                  |
| Total                               | 22 (20%)                      | 23 (24%)                     |                  |

Notes – Chi square test was used to compare groups

\* % Number of ROSC patients over total number of patients per years (110 patients 2019 and 95 patients 2020) with resuscitation attempted

+ % Hospital admission patients over total number of patients per years (110 patients 2019 and 95 patients 2020) with resuscitation attempted

§ % Hospital discharge patients over total number of patients per years (110 patients 2019 and 95 patients 2020) with resuscitation attempted

**Figure 2 Resuscitation not attempted and presenting rhythm**

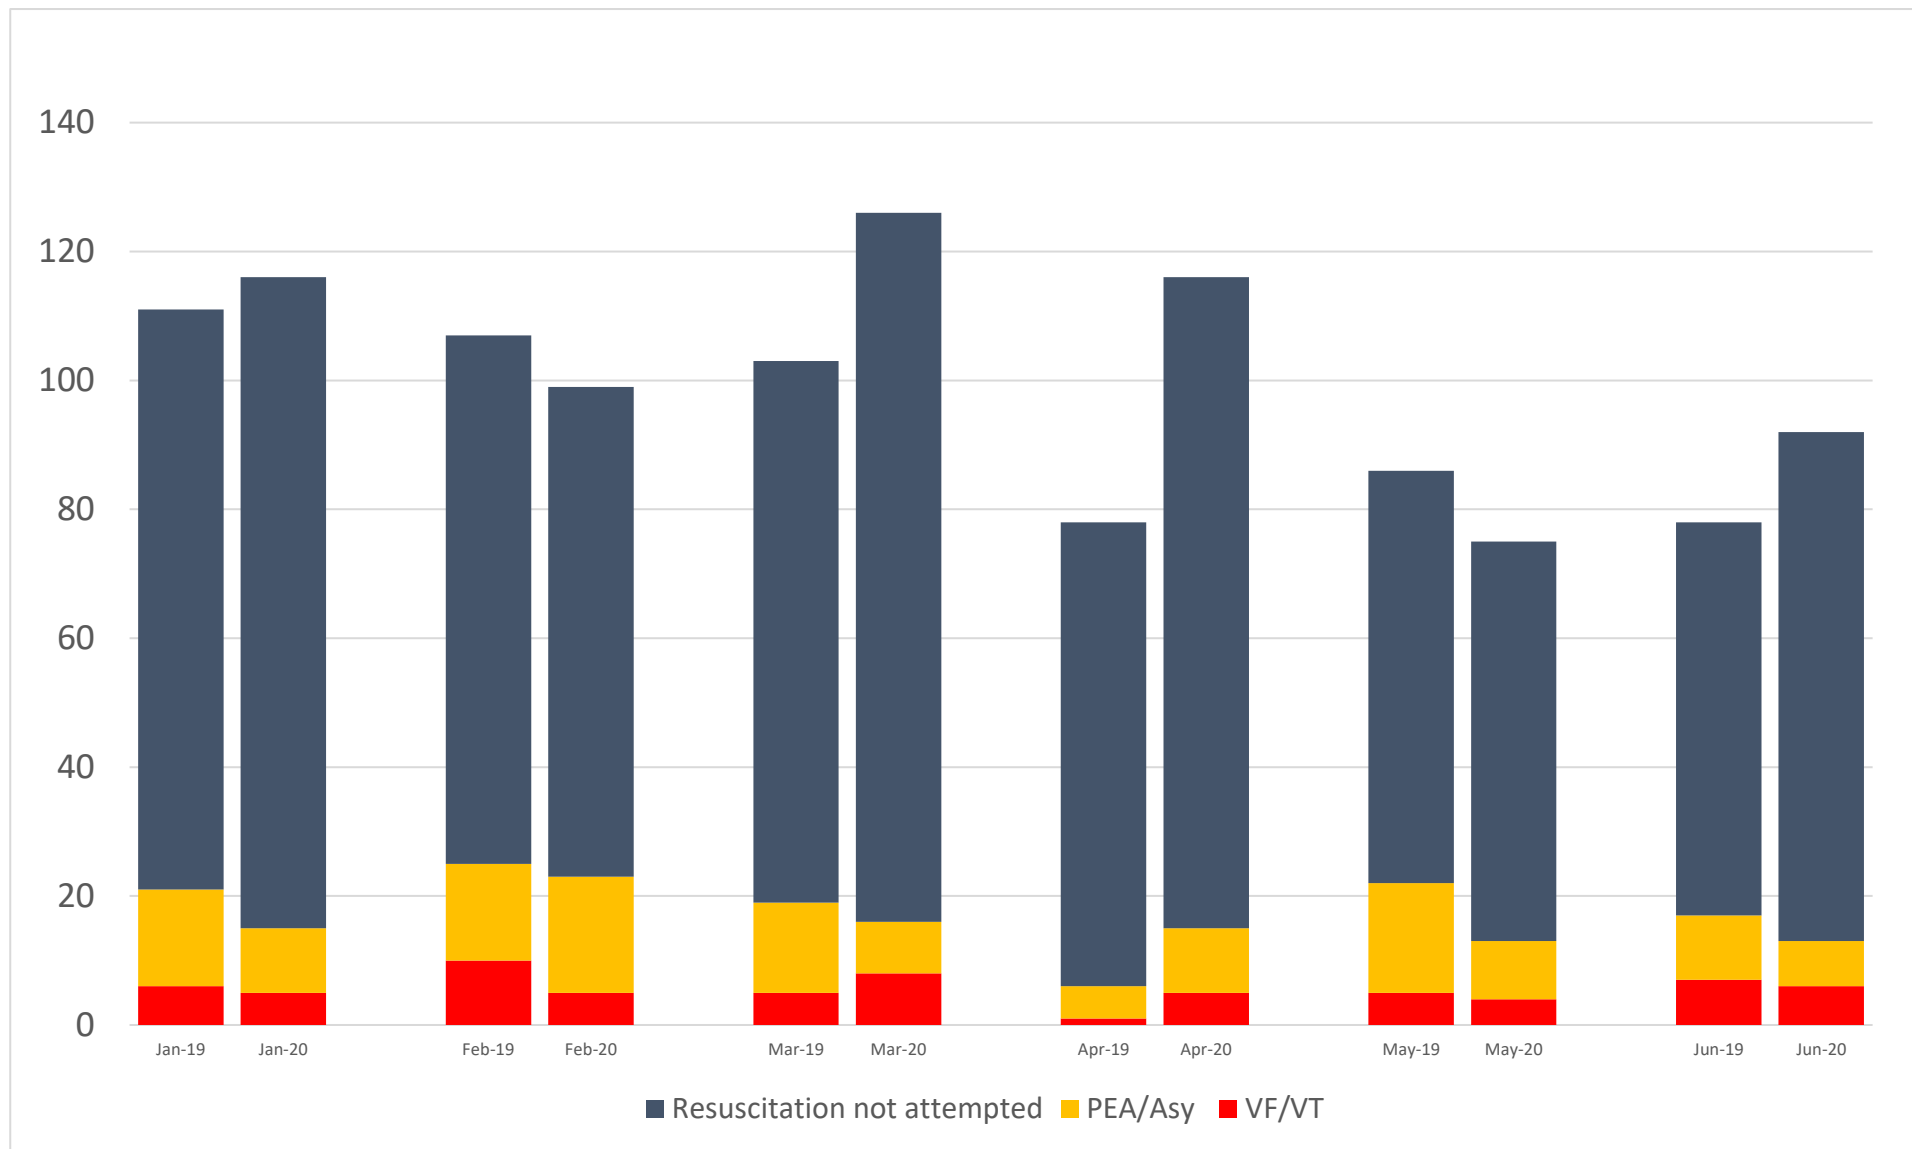

**Table 4: Utstein comparator group (cardiac arrest witnessed bystander with shockable rhythm)**

|                           | January - June 2019<br>Shockable (n = 34) | January - June 2020<br>Shockable (n = 33) |           |
|---------------------------|-------------------------------------------|-------------------------------------------|-----------|
| <b>Events</b>             | <b>N* (%)</b>                             | <b>N (%)<sup>+</sup></b>                  | p = 0.798 |
| Bystander shockable       | 27 (84%)                                  | 26 (87%)                                  |           |
| Unwitnessed shockable     | 5 (16%)                                   | 4 (13%)                                   |           |
| <b>ROSC</b>               | <b>N (%)</b>                              | <b>N (%)</b>                              | p = 0.894 |
| Bystander shockable       | 17 (94%)                                  | 14 (93%)                                  |           |
| Unwitnessed shockable     | 1 (6%)                                    | 1 (7%)                                    |           |
| <b>Hospital Admission</b> | <b>N (%)</b>                              | <b>N (%)</b>                              | p = 0.962 |
| Bystander shockable       | 15 (94%)                                  | 14 (93%)                                  |           |
| Unwitnessed shockable     | 1 (6%)                                    | 1 (7%)                                    |           |
| <b>Hospital Discharge</b> | <b>N (%)</b>                              | <b>N (%)</b>                              | p = 0.362 |
| Bystander shockable       | 12 (100%)                                 | 8 (100%)                                  |           |
| Unwitnessed shockable     | 0                                         | 0                                         |           |

Notes – Chi square test was used to compare groups

\* Two patients excluded from total shockable patients (EMS witnessed)

+ Three patients excluded from total shockable patients (EMS witnessed)

**Table 5: DAE RespondER (First responder App for Bologna, Casalecchio di Reno, San Lazzaro)**

|                              | Notification (n) |              | Accepted Notification (n) |           | Arrived on the patient (n) |          |
|------------------------------|------------------|--------------|---------------------------|-----------|----------------------------|----------|
|                              | 2019             | 2020         | 2019                      | 2020      | 2019                       | 2020     |
| <b>Bologna</b>               |                  |              |                           |           |                            |          |
| January                      | 4274             | 5444         | 6                         | 5         | 2                          | 1        |
| February                     | 5635             | 8808         | 11                        | 11        | 3                          | 1        |
| March                        | 5110             | 6300         | 11                        | 4         | 1                          | 1        |
| April                        | 4300             | 4879         | 4                         | 3         | 3                          | 1        |
| May                          | 3000             | 4734         | 13                        | 3         | 0                          | 0        |
| June                         | 3635             | 6050         | 6                         | 4         | 1                          | 1        |
| <b>Total</b>                 | <b>25954</b>     | <b>36215</b> | <b>51</b>                 | <b>30</b> | <b>10</b>                  | <b>5</b> |
| <b>Casalecchio di Reno</b>   |                  |              |                           |           |                            |          |
| January                      | 104              | 4            | 0                         | 0         | 0                          | 0        |
| February                     | 121              | 168          | 0                         | 1         | 0                          | 1        |
| March                        | 3                | 21           | 0                         | 0         | 0                          | 0        |
| April                        | 4                | 36           | 0                         | 0         | 0                          | 0        |
| May                          | 137              | 15           | 0                         | 0         | 0                          | 0        |
| June                         | 6                | 212          | 0                         | 0         | 0                          | 0        |
| <b>Total</b>                 | <b>375</b>       | <b>456</b>   | <b>0</b>                  | <b>1</b>  | <b>0</b>                   | <b>1</b> |
| <b>San Lazzaro di Savena</b> |                  |              |                           |           |                            |          |
| January                      | 4                | 116          | 0                         | 0         | 0                          | 0        |
| February                     | 87               | 6            | 1                         | 0         | 1                          | 0        |
| March                        | 0                | 17           | 0                         | 0         | 0                          | 0        |
| April                        | 4                | 17           | 0                         | 0         | 0                          | 0        |
| May                          | 4                | 21           | 0                         | 0         | 0                          | 0        |
| June                         | 119              | 15           | 0                         | 0         | 0                          | 0        |
| <b>Total</b>                 | <b>218</b>       | <b>192</b>   | <b>1</b>                  | <b>0</b>  | <b>1</b>                   | <b>0</b> |
| <b>Overall data</b>          | <b>26547</b>     | <b>36863</b> | <b>52</b>                 | <b>31</b> | <b>11</b>                  | <b>6</b> |

Acknowledgements

We want to thank all the members of our "System" that worked hard in the last six months and have continued to save lives from the field to the intensive care without fear. Over 300 members of our "system" worked with passion and heart.

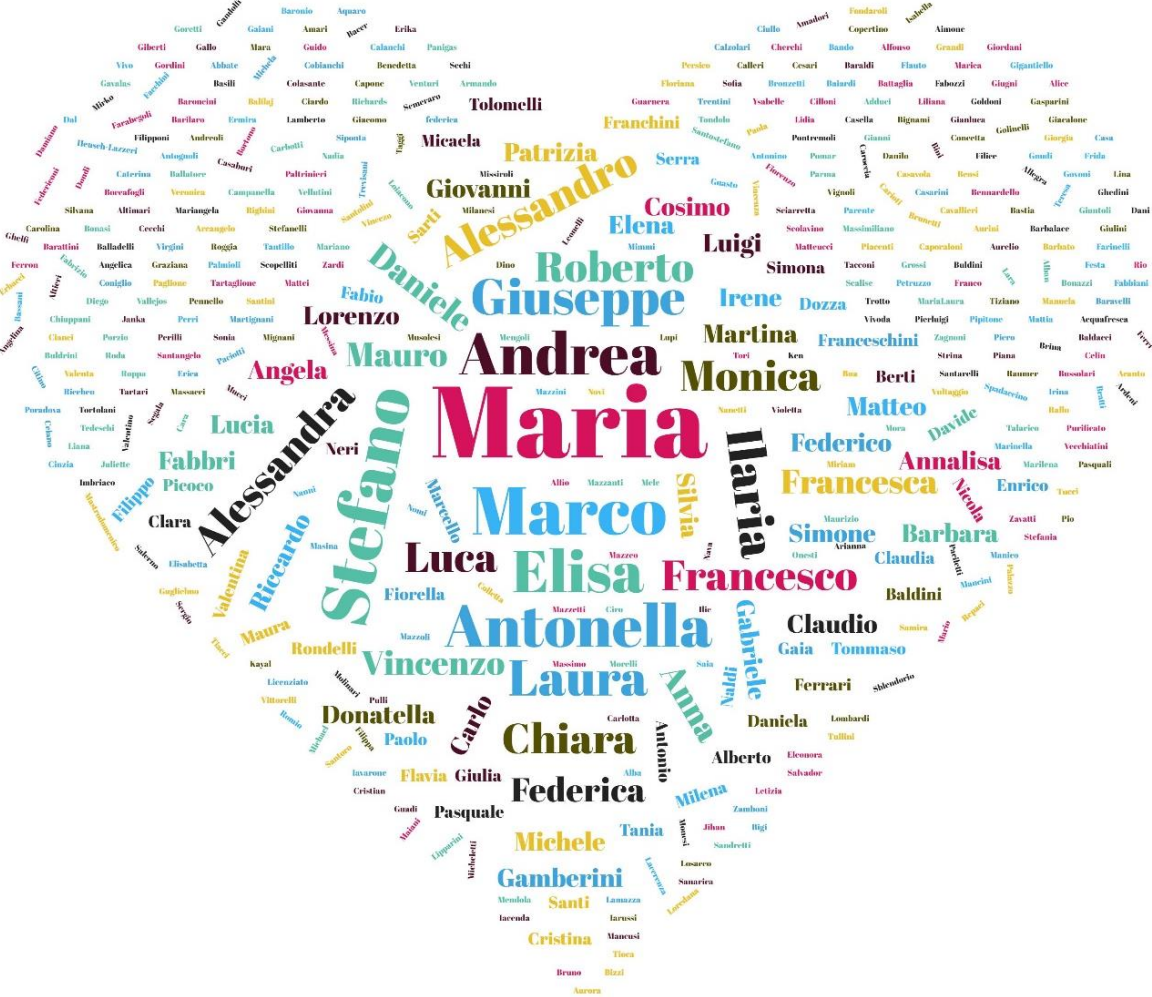

Supplement: mmc1.pdf [file mmc1.pdf]
